# Supplementary material
Source: PubMed Central journal article supplement (PMC10275968)
Supplement: mmc1.pdf [file mmc1.pdf]

iScience, Volume 26

## **Supplemental information**

### **SARS-CoV-2 S1 protein causes brain inflammation by reducing intracerebral acetylcholine production**

**Naomi Oka, Kazuya Shimada, Azusa Ishii, Nobuyuki Kobayashi, and Kazuhiro Kondo**

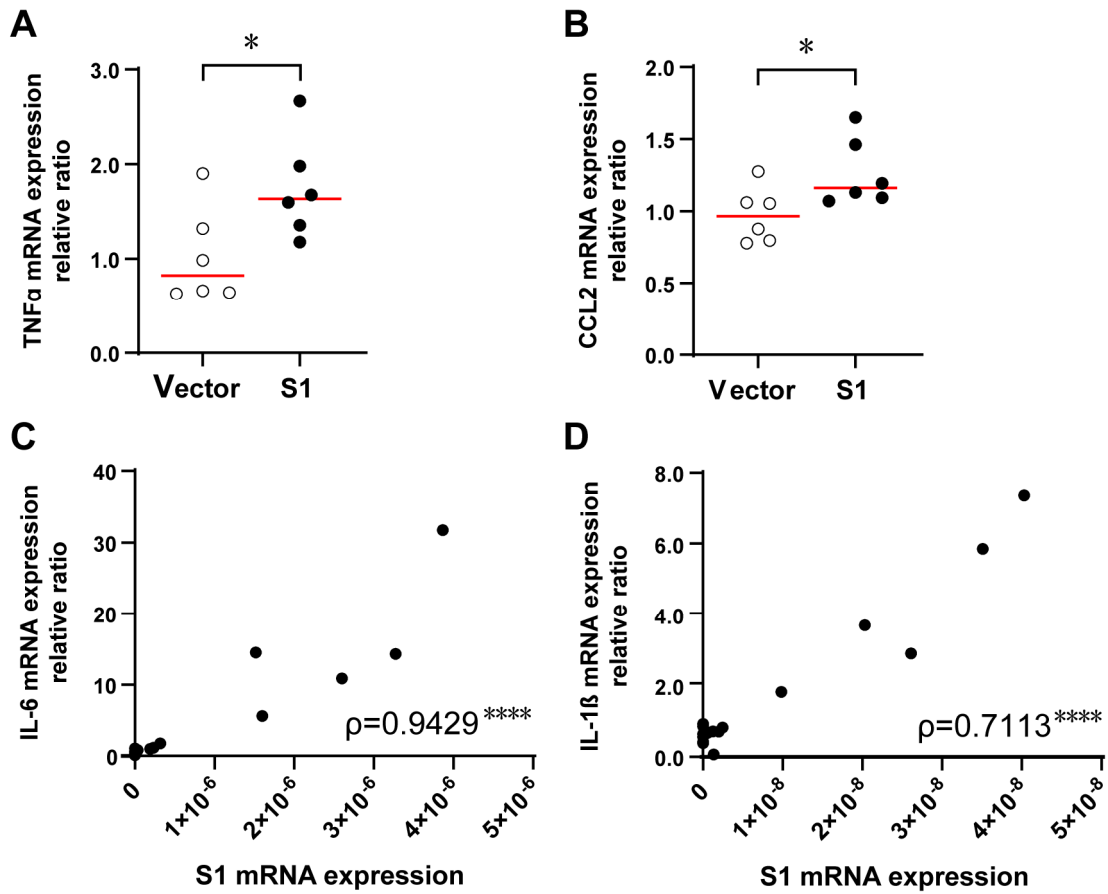

**Figure S1. Creation of COVID-19 encephalopathy model using S1 protein and analysis of S1 protein function, related to Figure 1.**

(A) Enhanced TNF $\alpha$  expression in S1 mouse brain tissue (vector control, n=6; S1 mouse, n=6; Mann-Whitney U-test; median values; \*, p < 0.05).

(B) Enhanced CCL-2 expression in S1 mouse brain tissue (vector control, n=6; S1 mouse, n=6; Mann-Whitney U-test; median values; \*, p < 0.05).

(C) Correlation of S1 mRNA expression and IL-6 mRNA expression in lung (n=22; Spearman's rank correlation test;  $\rho=0.9429$ , \*\*\*\*, p < 0.0001).

(D) Correlation of S1 mRNA expression and IL-1 $\beta$  mRNA expression in lung (n=18; Spearman's rank correlation test;  $\rho=0.7113$ , \*\*\*\*, p < 0.0001).

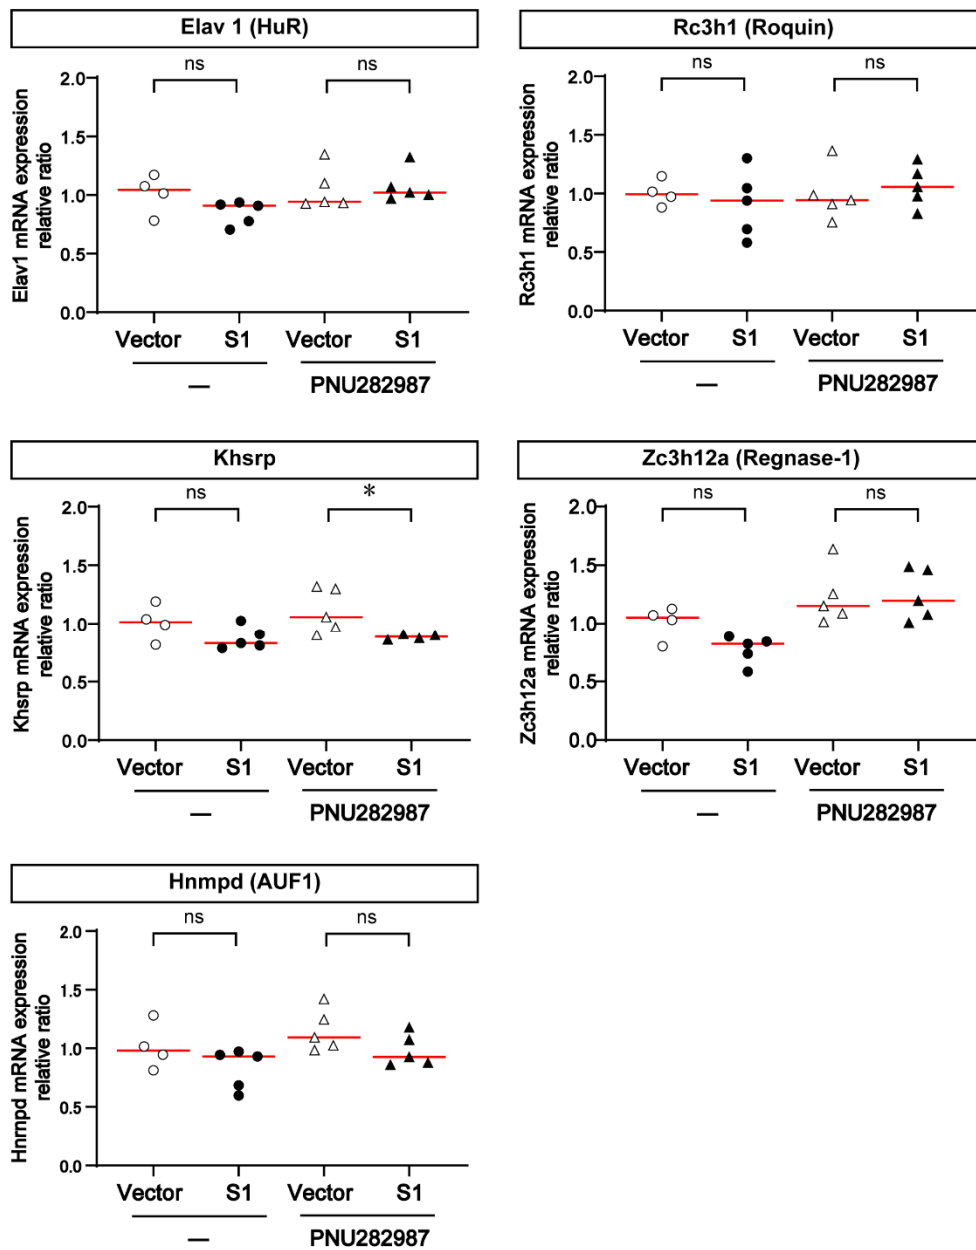

**Figure S2. Expression of RNA binding protein with inflammatory cytokine mRNA degrading function, related to Figure 2.**

Expression of the indicated genes was measured in brain tissue from S1 mouse and S1 mouse administered PNU282987. (no treatment; vector control, n=4, S1 mouse, n=5; Mann-Whitney U-test; median values; ns, not significant. Donepezil; vector control, n=5 S1 mouse, n=5 (Only one sample was excluded because it showed an abnormal value in the Khsrp measurement.); Mann-Whitney U-test; median values; ns, not significant; \*, p < 0.05).

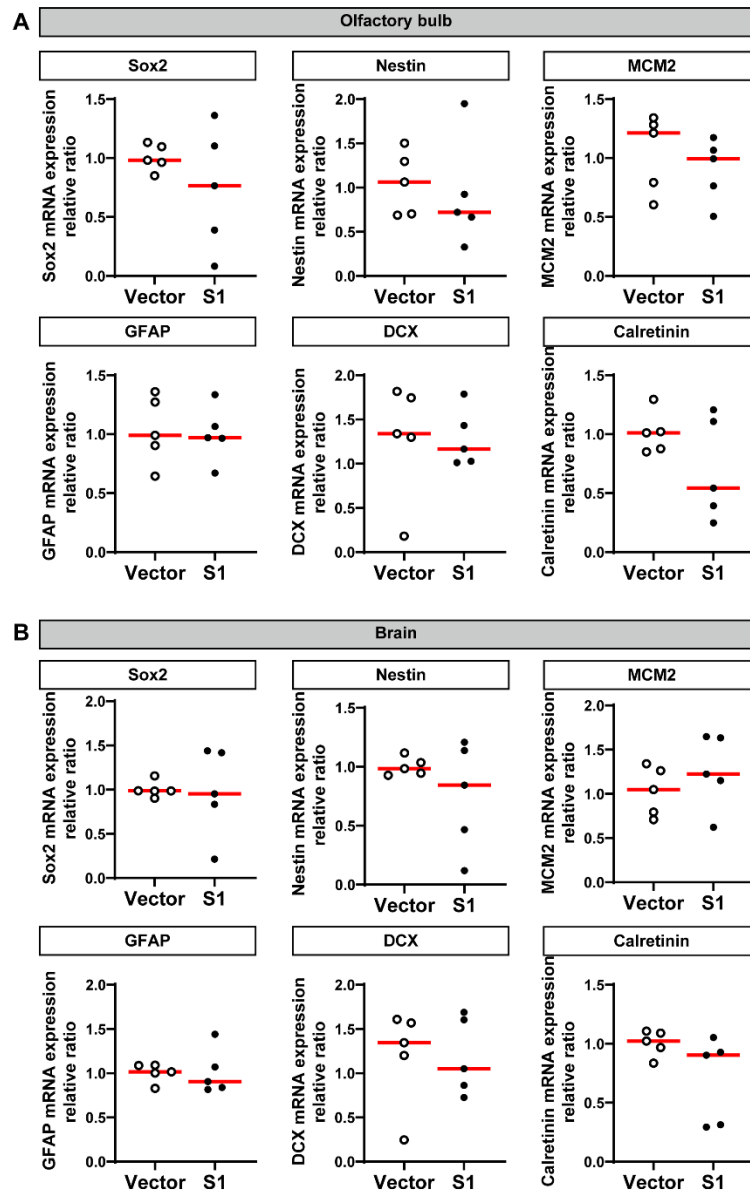

**Figure S3. Changes in nerve differentiation marker expression in S1 mice additionally administered LPS, related to Figure 2.**

(A) Changes in expression of indicated nerve differentiation marker genes in olfactory bulb tissue of S1 mice additionally administered LPS. (vector control, n=5 S1 mouse, n=5; Mann-Whitney U-test; median values).

(B) Changes in expression of indicated nerve differentiation marker genes in brain tissue of S1 mice additionally administered LPS. (vector control, n=5 S1 mouse, n=5; Mann-Whitney U-test; median values).

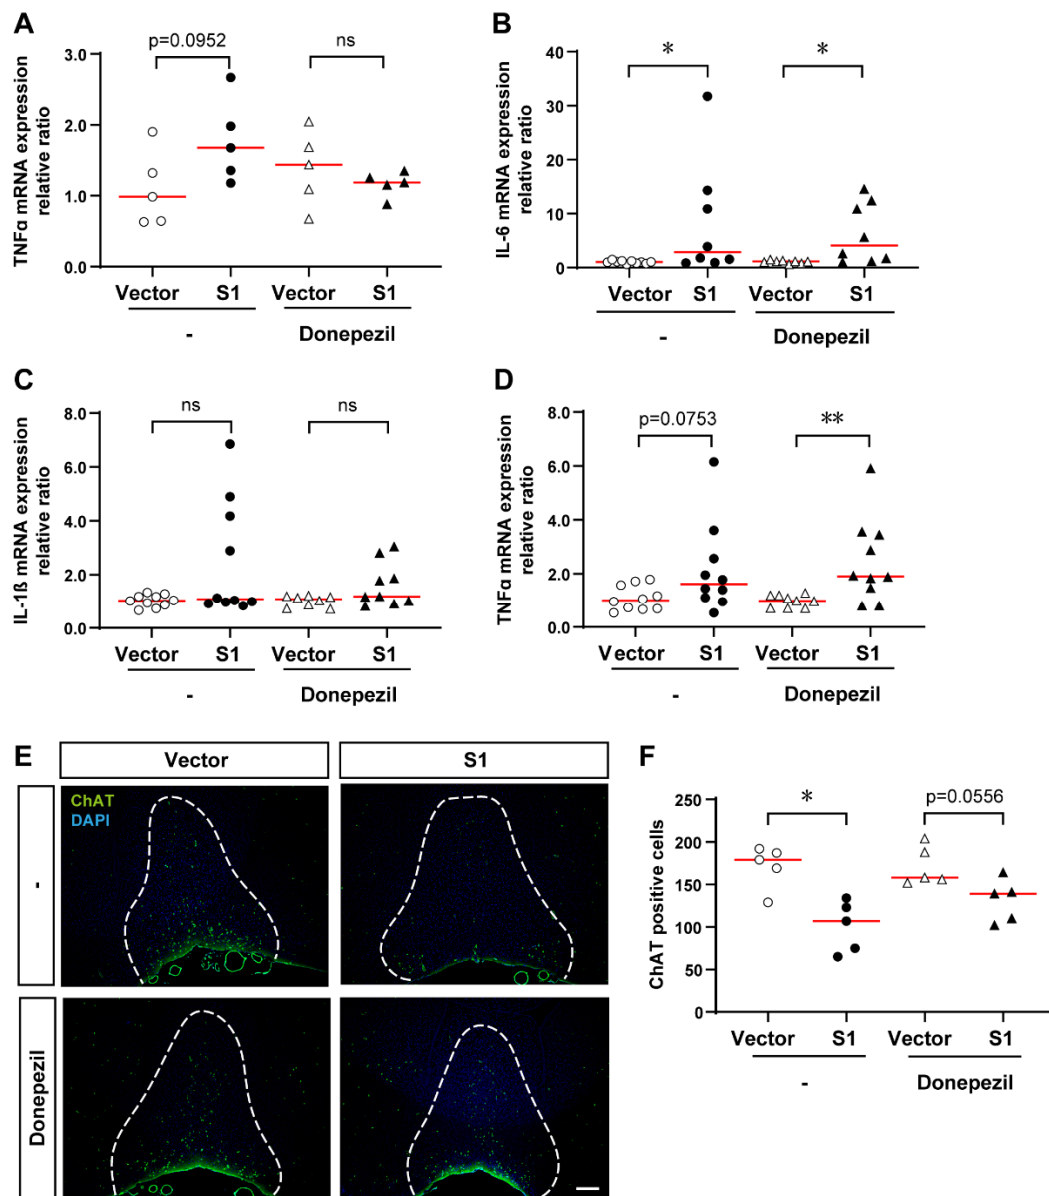

**Figure S4. Mitigation of olfactory and brain dysfunction in S1 mouse due to donepezil, related to Figure 3.**

(A) Enhanced TNFα expression in S1 mouse brain tissue and improvement due to donepezil (no treatment; vector control, n=5, S1 mouse, n=5; Mann-Whitney U-test; median values. Donepezil; vector control, n=5, S1 mouse, n=5; Mann-Whitney U-test; median values; ns, not significant).

(B) Enhanced IL-6 expression in S1 mouse lung tissue and effect of administering donepezil (no treatment; vector control, n=8, S1 mouse, n=8; Mann-Whitney U-test; median values; \*, p <

0.05. Donepezil; vector control, n=8, S1 mouse, n=8; Mann-Whitney U-test; median values; \*, p < 0.05).

(C) Enhanced IL-1 $\beta$  expression in S1 mouse lung tissue and effect of administering donepezil (no treatment; vector control, n=10, S1 mouse, n=10; Mann-Whitney U-test; median values; ns, not significant. Donepezil; vector control, n=8, S1 mouse, n=8; Mann-Whitney U-test; median values; ns, not significant).

(D) Enhanced TNF $\alpha$  expression in S1 mouse lung tissue and effect of administering donepezil (no treatment; vector control, n=10, S1 mouse, n=10; Mann-Whitney U-test; median values. Donepezil; vector control, n=10, S1 mouse, n=10; Mann-Whitney U-test; median values; \*\*, p < 0.01).

(E) Decreased ChAT positive cells in S1 mouse MS and DBB and effect of donepezil (green, ChAT; blue, DAPI; scale bar, 200 $\mu$ m).

(F) Decreased ChAT positive cells in S1 mouse MS and DBB and effect of donepezil (no treatment; vector control, n=5, S1 mouse, n=5; Mann-Whitney U-test; median values; \*, p < 0.05. Donepezil; vector control, n=5 S1 mouse, n=5; Mann-Whitney U-test; median values).
